# Supplementary material for: Adsorption of Magenta Dye on PbO Doped MgZnO: Interpretation of Statistical Physics Parameters Using Double-Layer Models
Source: MDPI journal article supplement (doi:10.3390/ijerph191912199), 2022-09-26
Supplement: s1 [file s1]

# Adsorption of Magenta Dye on PbO doped MgZnO: Interpretation of Statistical Physics Parameters using Double-layer Models

Tariq Altalhi<sup>a</sup>, Ganesh Jethave<sup>b</sup>, Umesh Fegade<sup>\*c</sup>, Gaber A. M. Mersal<sup>a</sup>, Mohamed M. Ibrahim<sup>a</sup>,  
M.H.H. Mahmoud<sup>a</sup>, Tushar Kumeria<sup>d</sup>, Kalpesh A. Isai<sup>e</sup>, Milind Sonawane<sup>e</sup>

<sup>a</sup>Department of Chemistry, College of Science, Taif University, P.O. Box 11099, Taif 21944,  
Saudi Arabia

<sup>b</sup>Department of Chemistry, Dr. Annasaheb G. D. Bendale Mahila Mahavidyalaya, Jalgaon  
425001

<sup>c</sup>Department of Chemistry, Bhusawal Arts, Science and P. O. Nahata Commerce College,  
Bhusawal, M. S. India.

<sup>d</sup>School of Materials Science and Engineering, The University of New South Wales, Sydney,  
New South Wales, 2052, Australia

<sup>e</sup>Department of Applied Science and Humanities, R. C. Patel Institute of Technology, Shirpur  
(MH), India

Corresponding author \*Email ID: umeshfegade@gmail.com (U. F)

---

## Supplementary Data

### 1. Chemical kinetic models (Pseudo-second-order)

The kinetics of MD adsorption on PbO@MgZnO was investigated by the Ho and McKay model; it is common used model that describes kinetics of dye adsorption on solid nanoparticles. The pseudo-second order model, proposed by Ho and McKay, can be represented in the following linear form [1].

In this model, graph was plotted in between  $t/q_t$  and  $t$  and experimental data was determined which show its appropriateness for explanation of whole adsorption process [2]. It was found that the plot of  $t/q_t$  versus  $t$  is a linear straight line.

The pseudo-second-order kinetic model is described by the formula

$$t/q_t = 1/k_{ad} q_e^2 + t/q_e \text{ ----- Eq. S1}$$

The results showed that the adsorption system followed the Ho and McKay equations for the entire adsorption.

## 2. Adsorption isotherms

The adsorption isotherms play an important role in determining the adsorption skill of MD onto PbO@MgZnO nanoparticles. Langmuir isotherm does not take into depiction the variation in adsorption energy, but it is the easiest explanation of the adsorption process [4]. It is used for the description of monolayer adsorption with interaction between adsorbed molecules [5, 6].

The general equation of the Langmuir isotherm [3] is:

$$q_e \alpha_L / K_L = K_L C_e / (1 + K_L C_e) \quad \text{----- Eq. S2}$$

After linearization of the Langmuir isotherm, Eq. (S3), we obtain

$$C_e / q_e = C_e \alpha_L / K_L + 1 / K_L \quad \text{----- Eq. S3}$$

where  $C_e$  is the equilibrium concentration and  $q_e$  is the amount of MD dye adsorbed in the solution (mg/L), per unit mass of adsorbent (mg/g), at equilibrium concentration,  $C_e$ ,  $\alpha_L$  ( $\text{Lmg}^{-1}$ ) and  $K_L$  ( $\text{L g}^{-1}$ ) are the Langmuir constants with  $\alpha_L$  related to the adsorption energy and  $q_{\max} [=K_L/\alpha_L]$  signifies the maximum adsorption capacity (mg/g), which depends on the number of adsorption sites. The Freundlich equilibrium isotherm equation was also used to describe experimental adsorption data [7].

The linearized form of the Freundlich adsorption isotherm equation is

$$\ln q_e = \ln K_f + \ln C_e / n f \quad \text{-----Eq. S4}$$

where  $C_e$  is the equilibrium concentration (mg/L),  $q_e$  is the amount of dye adsorbed at equilibrium (mg/g),  $K_f$  ( $\text{mg}^{1-n} \text{L}^n \text{g}^{-1}$ ) and  $1/n$  are Freundlich constants depending on the temperature and the given adsorbent–adsorbate couple [8]. The values of  $K_f$  and  $1/n$  calculated from the intercept and slope of the plot of  $\ln q_e$  Vs.  $\ln C_e$ .

### 3. Separation Factor

The Langmuir isotherm can be expressed in terms of a dimensionless constant separation factor ( $R_L$ ) given by the following equation:

$$R_L = 1 / (1 + \alpha_L C_o) \quad \text{----- Eq. S5}$$

$R_L$  values within the range  $0 < R_L < 1$  indicate favorable adsorption [9,10]. In this study,  $R_L$  value of PbO@MgZnO for the initial MD concentration of 2650 mg/L, obtained as 0.583, indicate favorable adsorption of MD onto them.

### 4. Adsorption Thermodynamic parameters

Thermodynamic parameters can offer further comprehensively information concerning the intrinsic energetic changes in adsorption process [11]. The  $G$  value indicates the nature of the reaction whether the reaction is spontaneous or nonspontaneous [12].

$$\Delta G^\circ = RT \ln K_L \quad \text{----- Eq. S6}$$

### References:

1. Das, P., & Debnath, A. (2021). Reactive orange 12 dye adsorption onto magnetically separable  $\text{CaFe}_2\text{O}_4$  nanoparticles synthesized by simple chemical route: kinetic, isotherm and neural network modeling. *Water Practice & Technology*, 16(4), 1141-1158.

2. Hussain, S., Kamran, M., Khan, S.A., Shaheen, K., Shah, Z., Suo, H., Khan, Q., Shah, A.B., Rehman, W.U., Al-Ghamdi, Y.O. and Ghani, U., (2021). Adsorption, kinetics and thermodynamics studies of methyl orange dye sequestration through chitosan composites films. *International journal of biological macromolecules*, 168, 383-394.
3. Hii, H. T. (2021). Adsorption isotherm and kinetic models for removal of methyl orange and remazol brilliant blue r by coconut shell activated carbon. *Tropical Aquatic and Soil Pollution*, 1(1), 1-10.
4. Aniagor, C. O., Afifi, M. A., & Hashem, A. (2021). Modelling of basic blue-9 dye sorption onto hydrolyzed polyacrylonitrile grafted starch composite. *Carbohydrate Polymer Technologies and Applications*, 2, 100141.
5. Grabi, H., Lemlikchi, W., Derridj, F., Lemlikchi, S., & Trari, M. (2021). Efficient native biosorbent derived from agricultural waste precursor for anionic dye adsorption in synthetic wastewater. *Biomass Conversion and Biorefinery*, 1-18.
6. Oueslati, K., Naifar, A., Sakly, A., Kyzas, G. Z., & Lamine, A. B. (2022). Statistical and physical interpretation of dye adsorption onto low-cost biomass by using simulation methods. *Colloids and Surfaces A: Physicochemical and Engineering Aspects*, 646, 128969.
7. Elsherif, K., El-Dali, A., Alkarewi, A., Ewlad-Ahmed, A., & Treban, A. (2021). Adsorption of crystal violet dye onto olive leaves powder: Equilibrium and kinetic studies. *KM Elsherif, A. El-Dali, AA Alkarewi, AM Ewlad-Ahmed and A. Treban. Adsorption of crystal violet dye onto olive leaves powder: Equilibrium and kinetic studies. Chemistry International*, 7(2), 79-89.

8. Raj, A., Yadav, A., Rawat, A.P., Singh, A.K., Kumar, S., Pandey, A.K., Sirohi, R. and Pandey, A., (2021). Kinetic and thermodynamic investigations of sewage sludge biochar in removal of Remazol Brilliant Blue R dye from aqueous solution and evaluation of residual dyes cytotoxicity. *Environmental Technology & Innovation*, 23, 101556.
9. Bensalah, J., Habsaoui, A., Dagdag, O., Lebdiri, A., Ismi, I., Rifi, E.H., Warad, I. and Zarrouk, A., (2021). Adsorption of a cationic dye (Safranin) by artificial cationic resins Amberlite UIRC-50: Equilibrium, kinetic and thermodynamic study. *Chemical Data Collections*, 35, 100756.
10. Yusuff, A. S., Ajayi, O. A., & Popoola, L. T. (2021). Application of Taguchi design approach to parametric optimization of adsorption of crystal violet dye by activated carbon from poultry litter. *Scientific African*, 13, e00850.
11. Sharma, K., Sharma, S., Sharma, V., Mishra, P. K., Ekielski, A., Sharma, V., & Kumar, V. (2021). Methylene blue dye adsorption from wastewater using hydroxyapatite/gold nanocomposite: Kinetic and thermodynamics studies. *Nanomaterials*, 11(6), 1403.
12. Banisheykholeslami, F., Hosseini, M., & Darzi, G. N. (2021). Design of PAMAM grafted chitosan dendrimers biosorbent for removal of anionic dyes: adsorption isotherms, kinetics and thermodynamics studies. *International Journal of Biological Macromolecules*, 177, 306-316.
